# Supplementary material
Source: PubMed Central journal article supplement (PMC3057527)
Supplement: NIHMS153801-supplement-supp2.pdf [file NIHMS153801-supplement-supp2.pdf]

## Authorship Responsibility and Copyright Transfer Agreement

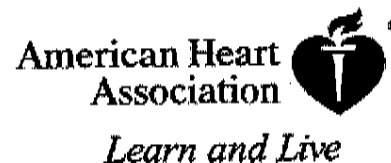

Each author must read and sign the statements in sections 1. (Authorship Responsibility, Criteria, and Contributions) and 3. (either Copyright Transfer or For U.S. Government Employee Authors). If needed, photocopy and distribute this document to coauthors.

Journal HYPERTENSION Manuscript number 131995 First author LIEB, DC

### 1. Authorship Responsibility, Criteria, and Contributions.

Each author should meet all criteria below (A, B, and C) and should indicate general and specific contributions by reading the criteria and checking the appropriate lines.

- A. I certify these three things:
- The manuscript represents valid work and neither it nor another one that that I have written with substantially similar content has been published or is being considered for publication elsewhere, except as described in an attachment.
  - If asked, I will provide or fully cooperate in obtaining and providing the data on which the manuscript is based so the editors or their assignees can examine it.
  - For papers with more than 1 author, I agree to allow the corresponding author to
    - be the main correspondent with the editorial office,
    - review the edited manuscript and proof, and
    - make decisions about releasing manuscript information to the media, federal agencies, or both.

If I am the only author, I will be the corresponding author and agree to handle these responsibilities.

- B. I have given final approval of the submitted manuscript.

Yes  No

- C. I have, or a coauthor has, had sufficient access to the data to verify the manuscript's scientific integrity.

Yes  No

- D. I have participated sufficiently in the manuscript to take public responsibility for (check only one)

part of the content  the whole content.

- E. To qualify for authorship, you must have made substantial contributions to the intellectual content of the paper. Please indicate your contribution(s) to this manuscript. Check all that apply.

- conceived and designed the research
- acquired the data
- analyzed and interpreted the data
- performed statistical analysis
- handled funding and supervision
- drafted the manuscript
- made critical revision of the manuscript for important intellectual content
- other (specify) \_\_\_\_\_

### 2. Acknowledgment Section (for Corresponding Author Only).

Authors should obtain written permission from all individuals who are listed in the "Acknowledgments" section of the manuscript, because readers may infer their endorsement of

data and conclusions. The corresponding author must sign the following statement, certifying that (1) all persons who have made substantial contributions in the manuscript (eg, data collection, analysis, or writing or editing assistance), but who do not fulfill authorship criteria, are named with their specific contributions in the Acknowledgments section of the manuscript; (2) all persons named in the Acknowledgments section have provided the corresponding author with written permission to be named in the manuscript; and (3) if an Acknowledgments section is not included, no other persons have made substantial contributions to this manuscript.

Corresponding Author's Signature: \_\_\_\_\_

### 3. Copyright Transfer Agreement.

The American Heart Association, Inc. (AHA), a New York not-for-profit corporation, located at 7272 Greenville Avenue, Dallas, Texas 75231, and the Author hereby agree:

In consideration of the AHA reviewing and editing the "Work" described below for first and exclusive publication,

Journal HYPERTENSION

Manuscript number \_\_\_\_\_

First author LIEB, DC

Title of "Work" RELATIONSHIP BETWEEN VOLT OF  
RENAL CYPHIC GENE AND INTERSTITIAL  
HYDROSTATIC PRESSURE IN PRESSURE-NAGNATED

The author who signs below hereby assigns, conveys, and otherwise transfers all rights, title, interest, and copyright ownership in this "Work" to the AHA when the AHA accepts it for publication.

- "Work" means the material submitted for publication plus any other related material submitted to the AHA.
- The rights assigned to the AHA include (but are not limited to) the rights to
  - edit, publish, reproduce, distribute copies, prepare derivative works, include in indexes or search databases in print, electronic, or other media, (whether or not they are used when this agreement is executed), and
  - claim copyright in this "Work" throughout the world for as long as it is copyrighted, including renewals or extensions.

All accepted "Works" become the AHA's property and may not be published elsewhere without the AHA's prior written permission.

- Authors may use parts of the "Work" (eg, tables, figures) in subsequent works without asking the AHA's permission.

For "Works" created under grant and accepted for publication in an AHA journal on or after May 2, 2005, the author may cause the "Accepted Version" of the "Work" to be posted on the Web archive of a body that funded all or part of the "Work", provided that this post appears no sooner than 6

## Authorship Responsibility and Copyright Transfer Agreement

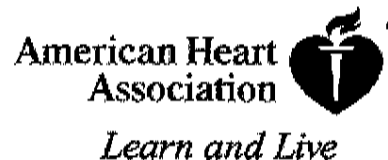

Each author must read and sign the statements in sections 1. (Authorship Responsibility, Criteria, and Contributions) and 3. (either Copyright Transfer or For U.S. Government Employee Authors). If needed, photocopy and distribute this document to coauthors.

Journal UWENDESION Manuscript number 131995 First author LIEB, OL

months after the AHA publishes the "Work" in a journal and that the archive is publicly and noncommercially available via the World Wide Web.

- The "Accepted Version" means the paper includes peer review changes but not AHA's copyediting and production changes.
- "No sooner than 6 months after the AHA publishes the "Work"" means at least 6 months after the first appearance of the "Work" either on the AHA journal's Web site as a publish ahead-of-print article or on the AHA journal's Web site published as part of a regular issue.

### Public Access Policy Funding Disclosure:

Please disclose below if the author has received funding for research on which the article is based from any of the following organizations:

- National Institutes of Health (NIH)  
 Wellcome Trust  
 Howard Hughes Medical Institute (HHMI)  
 Other (please list) \_\_\_\_\_

Authors hereby represent and warrant that

- they are the sole authors of the "Work",
- all authors have participated in and agree with the content and "Work's" conclusions,
- the "Work" is original and does not infringe upon any copyright, proprietary, or personal right of any third party, and
- no part of it nor any "Work" based on substantially similar data has been submitted to another journal for publication.

If the AHA does not publish this "Work", the authors will be notified and all rights given to the AHA will revert to them. If this is a joint "Work", all coauthors must transfer rights in this "Work" to the AHA by executing this Agreement. This Agreement must be executed as is without revision or substitution of terms. The author's original, handwritten signature is required. This Agreement is governed by the laws of the United States.

Author's Printed Name: DAVID LIEB

Signature: [Handwritten Signature]

Date Signed: 5-19-09

### For U.S. Government Employee Authors:

The person signing below hereby warrants that the "Work" described above was written by United States Government employees as part of their official duties and so may be published and reproduced without restriction. (All nongovernment employee authors or coauthors must sign the prior portion of this agreement transferring copyright.)

Author's Printed Name: \_\_\_\_\_

Signature: \_\_\_\_\_

Date Signed: \_\_\_\_\_

## Authorship Responsibility and Copyright Transfer Agreement

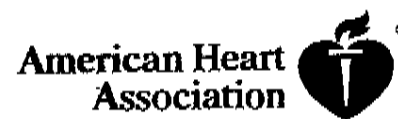

American Heart  
Association

Learn and Live

Each author must read and sign the statements in sections 1. (Authorship Responsibility, Criteria, and Contributions) and 3. (either Copyright Transfer or For U.S. Government Employee Authors). If needed, photocopy and distribute this document to coauthors.

Journal Hypertension Manuscript number Hypertension/2009/13195 First author Lieb, David C.

### 1. Authorship Responsibility, Criteria, and Contributions.

Each author should meet all criteria below (A, B, and C) and should indicate general and specific contributions by reading the criteria and checking the appropriate lines.

- A. I certify these three things:
- The manuscript represents valid work and neither it nor another one that that I have written with substantially similar content has been published or is being considered for publication elsewhere, except as described in an attachment.
  - If asked, I will provide or fully cooperate in obtaining and providing the data on which the manuscript is based so the editors or their assignees can examine it.
  - For papers with more than 1 author, I agree to allow the corresponding author to
    - be the main correspondent with the editorial office,
    - review the edited manuscript and proof, and
    - make decisions about releasing manuscript information to the media, federal agencies, or both.
- If I am the only author, I will be the corresponding author and agree to handle these responsibilities.

- B. I have given final approval of the submitted manuscript.  
 Yes  No
- C. I have, or a coauthor has, had sufficient access to the data to verify the manuscript's scientific integrity.  
 Yes  No
- D. I have participated sufficiently in the manuscript to take public responsibility for (check only one)  
 part of the content  the whole content.
- E. To qualify for authorship, you must have made substantial contributions to the intellectual content of the paper. Please indicate your contribution(s) to this manuscript. Check all that apply.
- conceived and designed the research  
 acquired the data  
 analyzed and interpreted the data  
 performed statistical analysis  
 handled funding and supervision  
 drafted the manuscript  
 made critical revision of the manuscript for important intellectual content  
 other (specify) \_\_\_\_\_

### 2. Acknowledgment Section (for Corresponding Author Only).

Authors should obtain written permission from all individuals who are listed in the Acknowledgments section of the manuscript, because readers may infer their endorsement of

data and conclusions. The corresponding author must sign the following statement, certifying that (1) all persons who have made substantial contributions in the manuscript (eg, data collection, analysis, or writing or editing assistance), but who do not fulfill authorship criteria, are named with their specific contributions in the Acknowledgments section of the manuscript; (2) all persons named in the Acknowledgments section have provided the corresponding author with written permission to be named in the manuscript; and (3) if an Acknowledgments section is not included, no other persons have made substantial contributions to this manuscript.

Corresponding Author's Signature: \_\_\_\_\_

### 3. Copyright Transfer Agreement.

The American Heart Association, Inc. (AHA), a New York not-for-profit corporation, located at 7272 Greenville Avenue, Dallas, Texas 75231, and the Author hereby agree:

In consideration of the AHA reviewing and editing the Work described below for first and exclusive publication,

Journal Hypertension  
 Manuscript number Hypertension/2009/13195  
 First author Lieb, David C.  
 Title of Work Reinforcing Feedback Loop of Renal Cycle GMP and Extracellular Hydrostatic Pressure in Pressure-Natriuresis

The author who signs below hereby assigns, conveys, and otherwise transfers all rights, title, interest, and copyright ownership in this Work to the AHA when the AHA accepts it for publication.

- "Work" means the material submitted for publication plus any other related material submitted to the AHA.
- The rights assigned to the AHA include (but are not limited to) the rights to
  - edit, publish, reproduce, distribute copies, prepare derivative works, include in indexes or search databases in print, electronic, or other media, (whether or not they are used when this agreement is executed), and
  - claim copyright in this Work throughout the world for as long as it is copyrighted, including renewals or extensions.

All accepted Works become the AHA's property and may not be published elsewhere without the AHA's prior written permission.

- Authors may use parts of the Work (eg, tables, figures) in subsequent works without asking the AHA's permission.

For Works created under grant and accepted for publication in an AHA journal, the author may cause the Accepted Version of the Work to be posted on the Web archive of a body that funded all or part of the Work, and/or an author's institutional repository, provided that this post appears no sooner than 6 months after the AHA publishes the Work in a journal and that

### Authorship Responsibility and Copyright Transfer Agreement

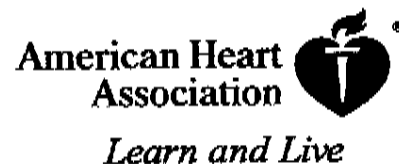

Each author must read and sign the statements in sections 1. (Authorship Responsibility, Criteria, and Contributions) and 3. (either Copyright Transfer or For U.S. Government Employee Authors). If needed, photocopy and distribute this document to coauthors.

Journal Hypertension Manuscript number Hypertension/2009/131975 First author Lieb, David C.

the archive is publicly and noncommercially available via the World Wide Web.

- The "Accepted Version" means the paper includes peer review changes but not AHA's copyediting and production changes.
- "No sooner than 6 months after the AHA publishes the Work" means at least 6 months after the first appearance of the Work either on the AHA journal's Web site as a publish-ahead-of-print article or on the AHA journal's Web site published as part of a regular issue.

#### Public Access Policy Funding Disclosure:

Please disclose below if the author has received funding for research on which the article is based from any of the following organizations:

- National Institutes of Health (NIH)
- Wellcome Trust
- Howard Hughes Medical Institute (HHMI)
- Other (please list) \_\_\_\_\_

Authors hereby represent and warrant that

- they are the sole authors of the Work,
- all authors have participated in and agree with the content and Work's conclusions,
- the Work is original and does not infringe upon any copyright, proprietary, or personal right of any third party, and
- no part of it nor any Work based on substantially similar data has been submitted to another journal for publication.

If the AHA does not publish this Work, the authors will be notified and all rights given to the AHA will revert to them. If this is a joint Work, all coauthors must transfer rights in this Work to the AHA by executing this Agreement. This Agreement must be executed as is without revision or substitution of terms. The author's original, handwritten signature is required. This Agreement is governed by the laws of the United States.

Author's Printed Name: Brandon A. Kemp  
 Signature: *Brandon A Kemp*  
 Date Signed: 9/9/09

#### For U.S. Government Employee Authors:

The person signing below hereby warrants that the Work described above was written by United States Government employees as part of their official duties and so may be published and reproduced without restriction. (All nongovernment employee authors or coauthors must sign the prior portion of this agreement transferring copyright.)

Author's Printed Name: \_\_\_\_\_

Signature: \_\_\_\_\_

Date Signed: \_\_\_\_\_

## Authorship Responsibility and Copyright Transfer Agreement

Each author must read and sign the statements in sections 1. (Authorship Responsibility, Criteria, and Contributions) and 3. (either Copyright Transfer or For U.S. Government Employee Authors). If needed, photocopy and distribute this document to coauthors.

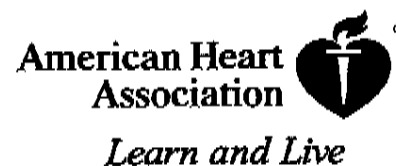

Journal Hypertension Manuscript number Hypertension/2009/131995 First author Lieb, David C.

### 1. Authorship Responsibility, Criteria, and Contributions.

Each author should meet all criteria below (A, B, and C) and should indicate general and specific contributions by reading the criteria and checking the appropriate lines.

- A. I certify these **three** things:
- The manuscript represents valid work and neither it nor another one that that I have written with substantially similar content has been published or is being considered for publication elsewhere, except as described in an attachment.
  - If asked, I will provide or fully cooperate in obtaining and providing the data on which the manuscript is based so the editors or their assignees can examine it.
  - For papers with more than 1 author, I agree to allow the corresponding author to
    - be the main correspondent with the editorial office,
    - review the edited manuscript and proof, and
    - make decisions about releasing manuscript information to the media, federal agencies, or both.

If I am the only author, I will be the corresponding author and agree to handle these responsibilities.

- B. I have given final approval of the submitted manuscript.  
 Yes  No
- C. I have, or a coauthor has, had sufficient access to the data to verify the manuscript's scientific integrity.  
 Yes  No
- D. I have participated sufficiently in the manuscript to take public responsibility for (check only one)  
 part of the content  the whole content.
- E. To qualify for authorship, you must have made substantial contributions to the intellectual content of the paper. Please indicate your contribution(s) to this manuscript. Check all that apply.
- conceived and designed the research
  - acquired the data
  - analyzed and interpreted the data
  - performed statistical analysis
  - handled funding and supervision
  - drafted the manuscript
  - made critical revision of the manuscript for important intellectual content
  - other (specify) \_\_\_\_\_

### 2. Acknowledgment Section (for Corresponding Author Only).

Authors should obtain written permission from all individuals who are listed in the Acknowledgments section of the manuscript, because readers may infer their endorsement of

data and conclusions. The corresponding author must sign the following statement, certifying that (1) all persons who have made substantial contributions in the manuscript (eg, data collection, analysis, or writing or editing assistance), but who do not fulfill authorship criteria, are named with their specific contributions in the Acknowledgments section of the manuscript; (2) all persons named in the Acknowledgments section have provided the corresponding author with written permission to be named in the manuscript; and (3) if an Acknowledgments section is not included, no other persons have made substantial contributions to this manuscript.

Corresponding Author's Signature: \_\_\_\_\_

### 3. Copyright Transfer Agreement.

The American Heart Association, Inc. (AHA), a New York not-for-profit corporation, located at 7272 Greenville Avenue, Dallas, Texas 75231, and the Author hereby agree:

In consideration of the AHA reviewing and editing the Work described below for first and exclusive publication,

Journal Hypertension  
 Manuscript number Hypertension/2009/131995  
 First author Lieb, David C.  
 Title of Work Reinforcing Feedback Loop of Renal Cyclic GMP and Interstitial Hydrostatic Pressure in Pressure-Natriuresis

The author who signs below hereby assigns, conveys, and otherwise transfers all rights, title, interest, and copyright ownership in this Work to the AHA when the AHA accepts it for publication.

- "Work" means the material submitted for publication plus any other related material submitted to the AHA.
- The rights assigned to the AHA include (but are not limited to) the rights to
  - edit, publish, reproduce, distribute copies, prepare derivative works, include in indexes or search databases in print, electronic, or other media, (whether or not they are used when this agreement is executed), and
  - claim copyright in this Work throughout the world for as long as it is copyrighted, including renewals or extensions.

All accepted Works become the AHA's property and may not be published elsewhere without the AHA's prior written permission.

- Authors may use parts of the Work (eg, tables, figures) in subsequent works without asking the AHA's permission.

For Works created under grant and accepted for publication in an AHA journal, the author may cause the Accepted Version of the Work to be posted on the Web archive of a body that funded all or part of the Work, and/or an author's institutional repository, provided that this post appears no sooner than 6 months after the AHA publishes the Work in a journal and that

## Authorship Responsibility and Copyright Transfer Agreement

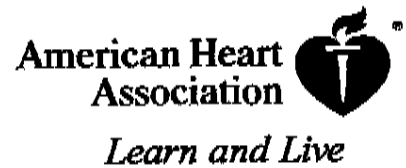

Each author must read and sign the statements in sections 1. (Authorship Responsibility, Criteria, and Contributions) and 3. (either Copyright Transfer or For U.S. Government Employee Authors). If needed, photocopy and distribute this document to coauthors.

Journal Hypertension Manuscript number Hypertension/2009/13/115 First author Lieb, David C.

the archive is publicly and noncommercially available via the World Wide Web.

- The "Accepted Version" means the paper includes peer review changes but not AHA's copyediting and production changes.
- "No sooner than 6 months after the AHA publishes the Work" means at least 6 months after the first appearance of the Work either on the AHA journal's Web site as a publish-ahead-of-print article or on the AHA journal's Web site published as part of a regular issue.

### Public Access Policy Funding Disclosure:

Please disclose below if the author has received funding for research on which the article is based from any of the following organizations:

- National Institutes of Health (NIH)  
 Wellcome Trust  
 Howard Hughes Medical Institute (HHMI)  
 Other (please list) \_\_\_\_\_

Authors hereby represent and warrant that

- they are the sole authors of the Work,
- all authors have participated in and agree with the content and Work's conclusions,
- the Work is original and does not infringe upon any copyright, proprietary, or personal right of any third party, and
- no part of it nor any Work based on substantially similar data has been submitted to another journal for publication.

If the AHA does not publish this Work, the authors will be notified and all rights given to the AHA will revert to them. If this is a joint Work, all coauthors must transfer rights in this Work to the AHA by executing this Agreement. This Agreement must be executed as is without revision or substitution of terms. The author's original, handwritten signature is required. This Agreement is governed by the laws of the United States.

Author's Printed Name: Nancy L. Howell  
 Signature: Nancy Howell  
 Date Signed: 9/9/09

### For U.S. Government Employee Authors:

The person signing below hereby warrants that the Work described above was written by United States Government employees as part of their official duties and so may be published and reproduced without restriction. (All nongovernment employee authors or coauthors must sign the prior portion of this agreement transferring copyright.)

Author's Printed Name: \_\_\_\_\_

Signature: \_\_\_\_\_

Date Signed: \_\_\_\_\_

## Authorship Responsibility and Copyright Transfer Agreement

Each author must read and sign the statements in sections 1. (Authorship Responsibility, Criteria, and Contributions) and 3. (either Copyright Transfer or For U.S. Government Employee Authors). If needed, photocopy and distribute this document to coauthors.

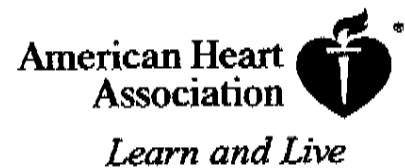

Journal Hypertension Manuscript number Hypertension/2009/131995 First author Lieb, David C.

### 1. Authorship Responsibility, Criteria, and Contributions.

Each author should meet all criteria below (A, B, and C) and should indicate general and specific contributions by reading the criteria and checking the appropriate lines.

- A. I certify these **three** things:
- The manuscript represents valid work and neither it nor another one that I have written with substantially similar content has been published or is being considered for publication elsewhere, except as described in an attachment.
  - If asked, I will provide or fully cooperate in obtaining and providing the data on which the manuscript is based so the editors or their assignees can examine it.
  - For papers with more than 1 author, I agree to allow the corresponding author to
    - be the main correspondent with the editorial office,
    - review the edited manuscript and proof, and
    - make decisions about releasing manuscript information to the media, federal agencies, or both.

If I am the only author, I will be the corresponding author and agree to handle these responsibilities.

- B. I have given final approval of the submitted manuscript.  
 Yes  No
- C. I have, or a coauthor has, had sufficient access to the data to verify the manuscript's scientific integrity.  
 Yes  No
- D. I have participated sufficiently in the manuscript to take public responsibility for (check only one)  
 part of the content  the whole content.
- E. To qualify for authorship, you must have made substantial contributions to the intellectual content of the paper. Please indicate your contribution(s) to this manuscript. Check all that apply.
- conceived and designed the research  
 acquired the data  
 analyzed and interpreted the data  
 performed statistical analysis  
 handled funding and supervision  
 drafted the manuscript  
 made critical revision of the manuscript for important intellectual content  
 other (specify) \_\_\_\_\_

### 2. Acknowledgment Section (for Corresponding Author Only).

Authors should obtain written permission from all individuals who are listed in the Acknowledgments section of the manuscript, because readers may infer their endorsement of

data and conclusions. The corresponding author must sign the following statement, certifying that (1) all persons who have made substantial contributions in the manuscript (eg, data collection, analysis, or writing or editing assistance), but who do not fulfill authorship criteria, are named with their specific contributions in the Acknowledgments section of the manuscript; (2) all persons named in the Acknowledgments section have provided the corresponding author with written permission to be named in the manuscript; and (3) if an Acknowledgments section is not included, no other persons have made substantial contributions to this manuscript.

Corresponding Author's Signature: \_\_\_\_\_

### 3. Copyright Transfer Agreement.

The American Heart Association, Inc. (AHA), a New York not-for-profit corporation, located at 7272 Greenville Avenue, Dallas, Texas 75231, and the Author hereby agree:

In consideration of the AHA reviewing and editing the Work described below for first and exclusive publication,

Journal Hypertension  
 Manuscript number Hypertension/2009/131995  
 First author Lieb, David C.  
 Title of Work Reinforcing Feedback Loop of Renal  
 Cycliz GMP and Interstitial Hydrostatic  
 Pressure in Pressure-Natriuresis

The author who signs below hereby assigns, conveys, and otherwise transfers all rights, title, interest, and copyright ownership in this Work to the AHA when the AHA accepts it for publication.

- "Work" means the material submitted for publication plus any other related material submitted to the AHA.
- The rights assigned to the AHA include (but are not limited to) the rights to
  - edit, publish, reproduce, distribute copies, prepare derivative works, include in indexes or search databases in print, electronic, or other media, (whether or not they are used when this agreement is executed), and
  - claim copyright in this Work throughout the world for as long as it is copyrighted, including renewals or extensions.

All accepted Works become the AHA's property and may not be published elsewhere without the AHA's prior written permission.

- Authors may use parts of the Work (eg, tables, figures) in subsequent works without asking the AHA's permission.

For Works created under grant and accepted for publication in an AHA journal, the author may cause the Accepted Version of the Work to be posted on the Web archive of a body that funded all or part of the Work, and/or an author's institutional repository, provided that this post appears no sooner than 6 months after the AHA publishes the Work in a journal and that

### Authorship Responsibility and Copyright Transfer Agreement

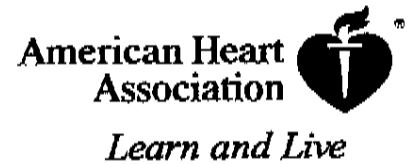

Each author must read and sign the statements in sections 1. (Authorship Responsibility, Criteria, and Contributions) and 3. (either Copyright Transfer or For U.S. Government Employee Authors). If needed, photocopy and distribute this document to coauthors.

Journal Hypertension Manuscript number Hypertension/2009/131995 First author Lichy David C

the archive is publicly and noncommercially available via the World Wide Web.

- The "Accepted Version" means the paper includes peer review changes but not AHA's copyediting and production changes.
- "No sooner than 6 months after the AHA publishes the Work" means at least 6 months after the first appearance of the Work either on the AHA journal's Web site as a publish-ahead-of-print article or on the AHA journal's Web site published as part of a regular issue.

#### Public Access Policy Funding Disclosure:

Please disclose below if the author has received funding for research on which the article is based from any of the following organizations:

- National Institutes of Health (NIH)
- Wellcome Trust
- Howard Hughes Medical Institute (HHMI)
- Other (please list) \_\_\_\_\_

Authors hereby represent and warrant that

- they are the sole authors of the Work,
- all authors have participated in and agree with the content and Work's conclusions,
- the Work is original and does not infringe upon any copyright, proprietary, or personal right of any third party, and
- no part of it nor any Work based on substantially similar data has been submitted to another journal for publication.

If the AHA does not publish this Work, the authors will be notified and all rights given to the AHA will revert to them. If this is a joint Work, all coauthors must transfer rights in this Work to the AHA by executing this Agreement. This Agreement must be executed as is without revision or substitution of terms. The author's original, handwritten signature is required. This Agreement is governed by the laws of the United States.

Author's Printed Name: John J. Gildea  
 Signature: [Handwritten Signature]  
 Date Signed: 9/9/09

#### For U.S. Government Employee Authors:

The person signing below hereby warrants that the Work described above was written by United States Government employees as part of their official duties and so may be published and reproduced without restriction. (All nongovernment employee authors or coauthors must sign the prior portion of this agreement transferring copyright.)

Author's Printed Name: \_\_\_\_\_

Signature: \_\_\_\_\_

Date Signed: \_\_\_\_\_



## Authorship Responsibility and Copyright Transfer Agreement

Each author must read and sign the statements in sections 1. (Authorship Responsibility, Criteria, and Contributions) and 3. (either Copyright Transfer or For U.S. Government Employee Authors). If needed, photocopy and distribute this document to coauthors.

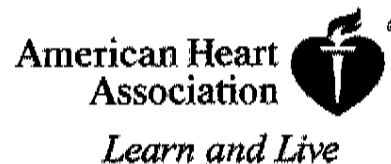

Journal HYPERTENSION Manuscript number 131995 First author LIEB, DC

### 1. Authorship Responsibility, Criteria, and Contributions.

Each author should meet all criteria below (A, B, and C) and should indicate general and specific contributions by reading the criteria and checking the appropriate lines.

A. I certify these three things:

- The manuscript represents valid work and neither it nor another one that that I have written with substantially similar content has been published or is being considered for publication elsewhere, except as described in an attachment.
- If asked, I will provide or fully cooperate in obtaining and providing the data on which the manuscript is based so the editors or their assignees can examine it.
- For papers with more than 1 author, I agree to allow the corresponding author to
  - be the main correspondent with the editorial office,
  - review the edited manuscript and proof, and
  - make decisions about releasing manuscript information to the media, federal agencies, or both.

If I am the only author, I will be the corresponding author and agree to handle these responsibilities.

B. I have given final approval of the submitted manuscript.

Yes  No

C. I have, or a coauthor has, had sufficient access to the data to verify the manuscript's scientific integrity.

Yes  No

D. I have participated sufficiently in the manuscript to take public responsibility for (check only one)

part of the content  the whole content.

E. To qualify for authorship, you must have made substantial contributions to the intellectual content of the paper. Please indicate your contribution(s) to this manuscript. Check all that apply.

- conceived and designed the research
- acquired the data
- analyzed and interpreted the data
- performed statistical analysis
- handled funding and supervision
- drafted the manuscript
- made critical revision of the manuscript for important intellectual content
- other (specify) \_\_\_\_\_

### 2. Acknowledgment Section (for Corresponding Author Only).

Authors should obtain written permission from all individuals who are listed in the "Acknowledgments" section of the manuscript, because readers may infer their endorsement of

data and conclusions. The corresponding author must sign the following statement, certifying that (1) all persons who have made substantial contributions in the manuscript (eg, data collection, analysis, or writing or editing assistance), but who do not fulfill authorship criteria, are named with their specific contributions in the Acknowledgments section of the manuscript; (2) all persons named in the Acknowledgments section have provided the corresponding author with written permission to be named in the manuscript; and (3) if an Acknowledgments section is not included, no other persons have made substantial contributions to this manuscript.

Corresponding Author's Signature: DC Lieb

### 3. Copyright Transfer Agreement.

The American Heart Association, Inc. (AHA), a New York not-for-profit corporation, located at 7272 Greenville Avenue, Dallas, Texas 75231, and the Author hereby agree:

In consideration of the AHA reviewing and editing the "Work" described below for first and exclusive publication,

Journal HYPERTENSION

Manuscript number \_\_\_\_\_

First author LIEB, DC

Title of "Work" REINFORCING FEEDBACK LOOP OF RENAL NUCLEUS AND INTERSTITIAL RENOVASCULAR HYPERTENSION IN PRESSURE-NATURALIS

The author who signs below hereby assigns, conveys, and otherwise transfers all rights, title, interest, and copyright ownership in this "Work" to the AHA when the AHA accepts it for publication.

- "Work" means the material submitted for publication plus any other related material submitted to the AHA.
- The rights assigned to the AHA include (but are not limited to) the rights to
  - edit, publish, reproduce, distribute copies, prepare derivative works, include in indexes or search databases in print, electronic, or other media, (whether or not they are used when this agreement is executed), and
  - claim copyright in this "Work" throughout the world for as long as it is copyrighted, including renewals or extensions.

All accepted "Works" become the AHA's property and may not be published elsewhere without the AHA's prior written permission.

- Authors may use parts of the "Work" (eg, tables, figures) in subsequent works without asking the AHA's permission.

For "Works" created under grant and accepted for publication in an AHA journal on or after May 2, 2005, the author may cause the "Accepted Version" of the "Work" to be posted on the Web archive of a body that funded all or part of the "Work", provided that this post appears no sooner than 6

## Authorship Responsibility and Copyright Transfer Agreement

Each author must read and sign the statements in sections 1. (Authorship Responsibility, Criteria, and Contributions) and 3. (either Copyright Transfer or For U.S. Government Employee Authors). If needed, photocopy and distribute this document to coauthors.

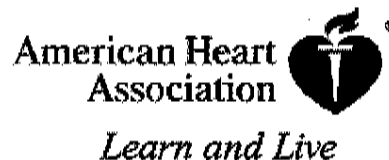

Journal WUEN 2009 Manuscript number 131995 First author WUEN DC

months after the AHA publishes the "Work" in a journal and that the archive is publicly and noncommercially available via the World Wide Web.

- The "Accepted Version" means the paper includes peer review changes but not AHA's copyediting and production changes.
- "No sooner than 6 months after the AHA publishes the 'Work'" means at least 6 months after the first appearance of the "Work" either on the AHA journal's Web site as a publish ahead-of-print article or on the AHA journal's Web site published as part of a regular issue.

### Public Access Policy Funding Disclosure:

Please disclose below if the author has received funding for research on which the article is based from any of the following organizations:

- National Institutes of Health (NIH)  
 Wellcome Trust  
 Howard Hughes Medical Institute (HHMI)  
 Other (please list) \_\_\_\_\_

Authors hereby represent and warrant that

- they are the sole authors of the "Work",
- all authors have participated in and agree with the content and "Work's" conclusions,
- the "Work" is original and does not infringe upon any copyright, proprietary, or personal right of any third party, and
- no part of it nor any "Work" based on substantially similar data has been submitted to another journal for publication.

If the AHA does not publish this "Work", the authors will be notified and all rights given to the AHA will revert to them. If this is a joint "Work", all coauthors must transfer rights in this "Work" to the AHA by executing this Agreement. This Agreement must be executed as is without revision or substitution of terms. The author's original, handwritten signature is required. This Agreement is governed by the laws of the United States.

Author's Printed Name: ROBERT M. CAREY

Signature: Robert M. Carey

Date Signed: 5/6/09

### For U.S. Government Employee Authors:

The person signing below hereby warrants that the "Work" described above was written by United States Government employees as part of their official duties and so may be published and reproduced without restriction. (All nongovernment employee authors or coauthors must sign the prior portion of this agreement transferring copyright.)

Author's Printed Name: \_\_\_\_\_

Signature: \_\_\_\_\_

Date Signed: \_\_\_\_\_
