# Supplementary material
Source: PubMed Central journal article supplement (PMC3057527)
Supplement: NIHMS153801-supplement-supp3.pdf [file NIHMS153801-supplement-supp3.pdf]

DONATE HELP CONTACT AHA SIGN IN HOME

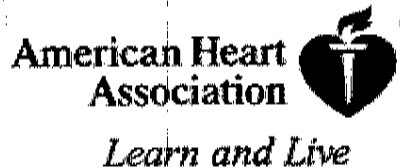

# AHA Journals

Search:

Go

Advanced Search

AHA Journals Home • Subscriptions • Feedback • Help

## Acknowledgment Permission Form

Journal Hypertension

Manuscript No. 131995

First author Lieb, David C.

Title of work REINFORCING FEEDBACK LOOP OF RENAL CYCLIC GMP AND INTERSTITIAL HYDROSTATIC PRESSURE IN PRESSURE-NATRIUMSIS

### Acknowledgment Permission:

Authors must provide written permission/approval from all individuals mentioned by name in the Acknowledgements section of a submitted manuscript. By signing this form, any and all acknowledged persons therefore state that they have read and approved the mention of their names in the Acknowledgment section of the aforementioned paper.

Printed Name Susanna R. Keller

Signature *Susanna R. Keller*

Date 5/6/09

Printed Name SHEYAL PADIA

Signature *S. Padia*

Date 5/6/09

Printed Name
